# Supplementary material for: Solvent-free synthesis of 1,2-dihydro-1-arylnaphtho[1,2- e ] [1,3] oxazine-3-ones using a magnetic nickel–zinc ferrite nanocatalyst
Source: Royal Society of Chemistry journal article supplement (doi:10.1039/d4ra05486e), 2025-01-01

## Solvent-Free Synthesis of 1,2-Dihydro-1-arylnaphtho[1,2-e] [1,3] oxazine-3-ones Using Magnetic Nickel -Zinc Ferrite Nanocatalyst

Sreelakshmi Sreekandan<sup>1</sup>, Anjitha Thadathil,<sup>2</sup> Bindu Mavila,<sup>3</sup> Kannan Vellayan<sup>1\*</sup>, Pradeepan Periyat<sup>3\*</sup>

<sup>1</sup>Department of Chemistry, Government College, Kattappana

<sup>2</sup>Department of Chemistry, University of Calicut

<sup>3</sup>Department of Environmental Studies, Kannur University

\*Correspondence: Email: kannanpvl@gmail.com, pperiyat@kannuruniv.ac.in

---

Reaction No.1 Product Code: NU1

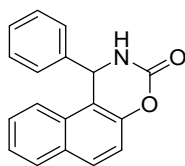

Reaction No.2. Product Code: NU2

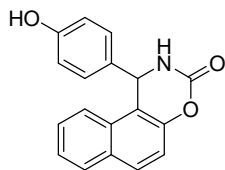

Reaction No.3. Product Code: NU3

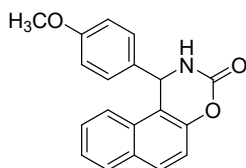

Reaction No. 4. Product Code: NU4

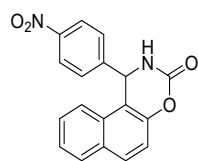

Reaction No. 5 Product Code: NU5

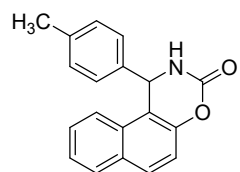

Reaction No. 6 Product Code: NU6

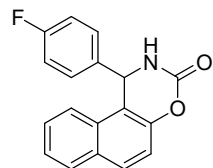

Reaction No. 7 Product Code: NU7

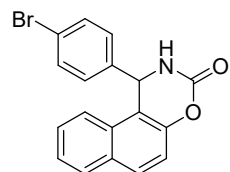

**H<sup>1</sup>-NMR**

Reaction No.1 Product Code: NU1

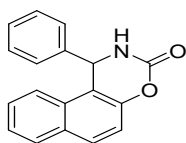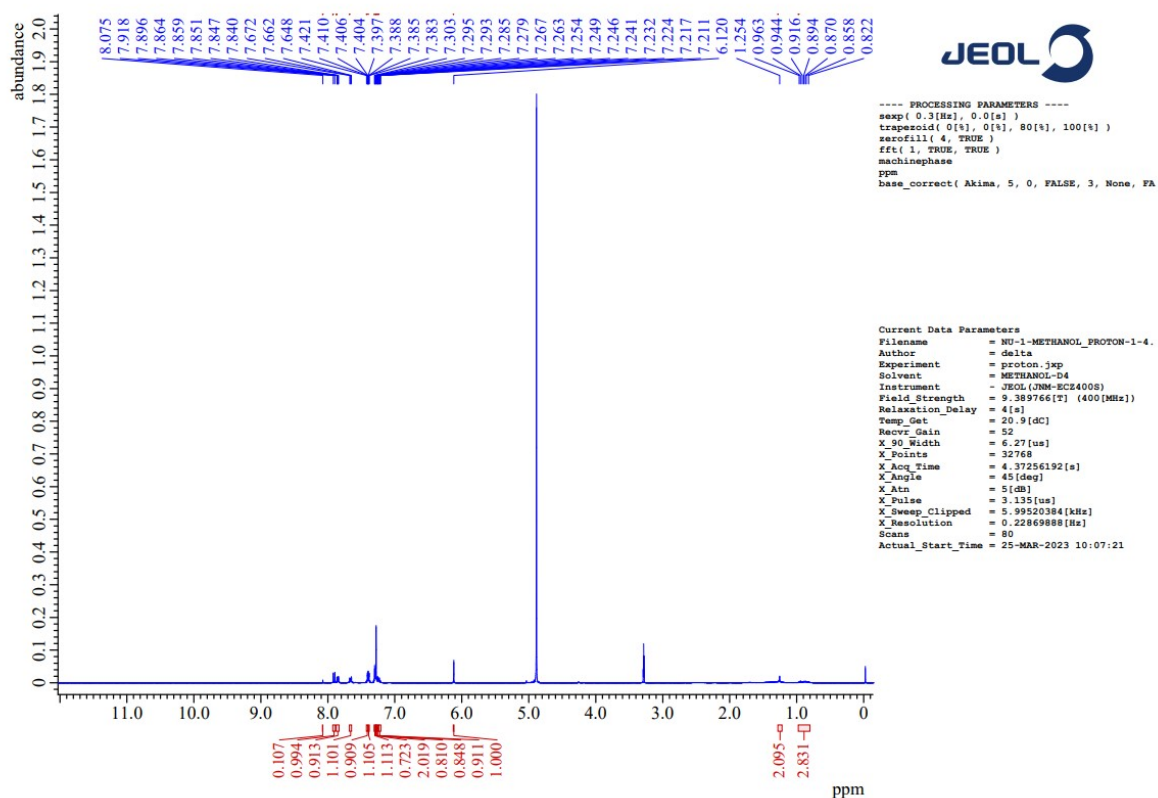

# <sup>1</sup>H-NMR

Reaction No.2. Product Code: NU2

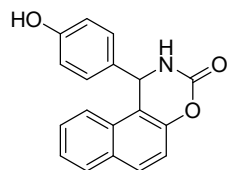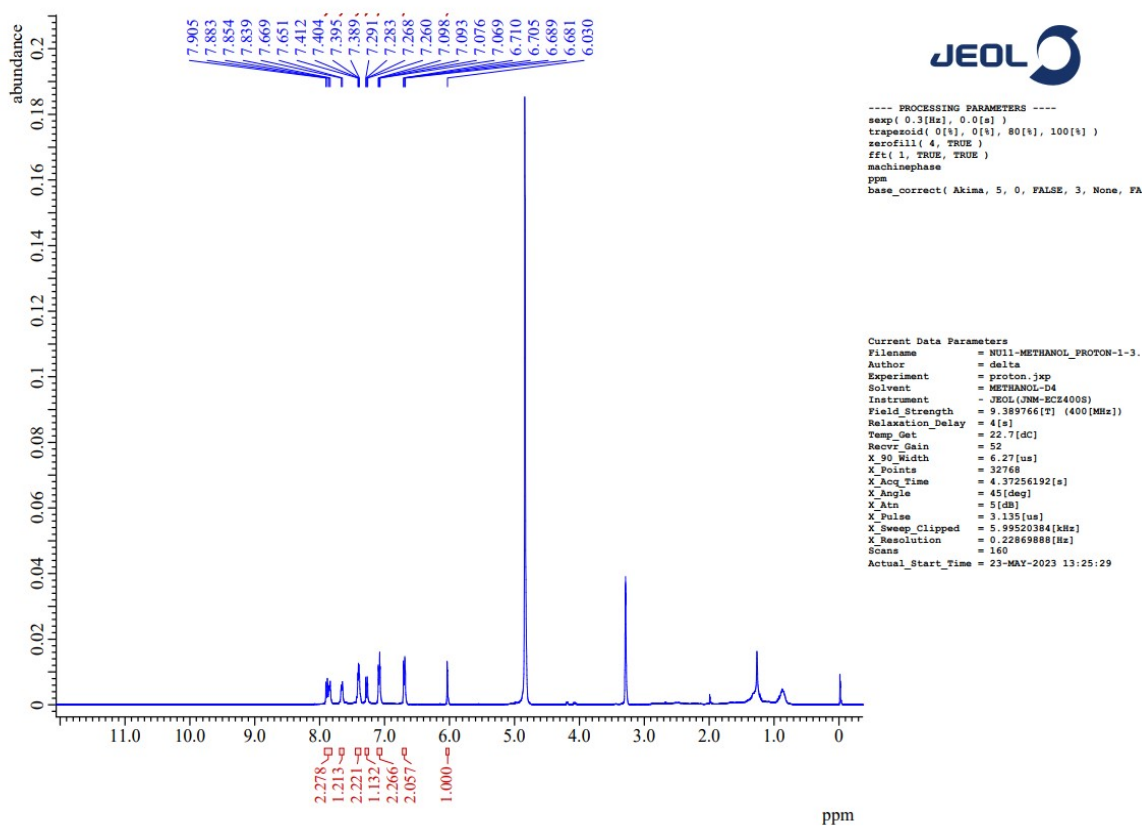

# <sup>1</sup>H-NMR

Reaction No.3. Product Code: NU3

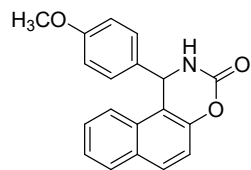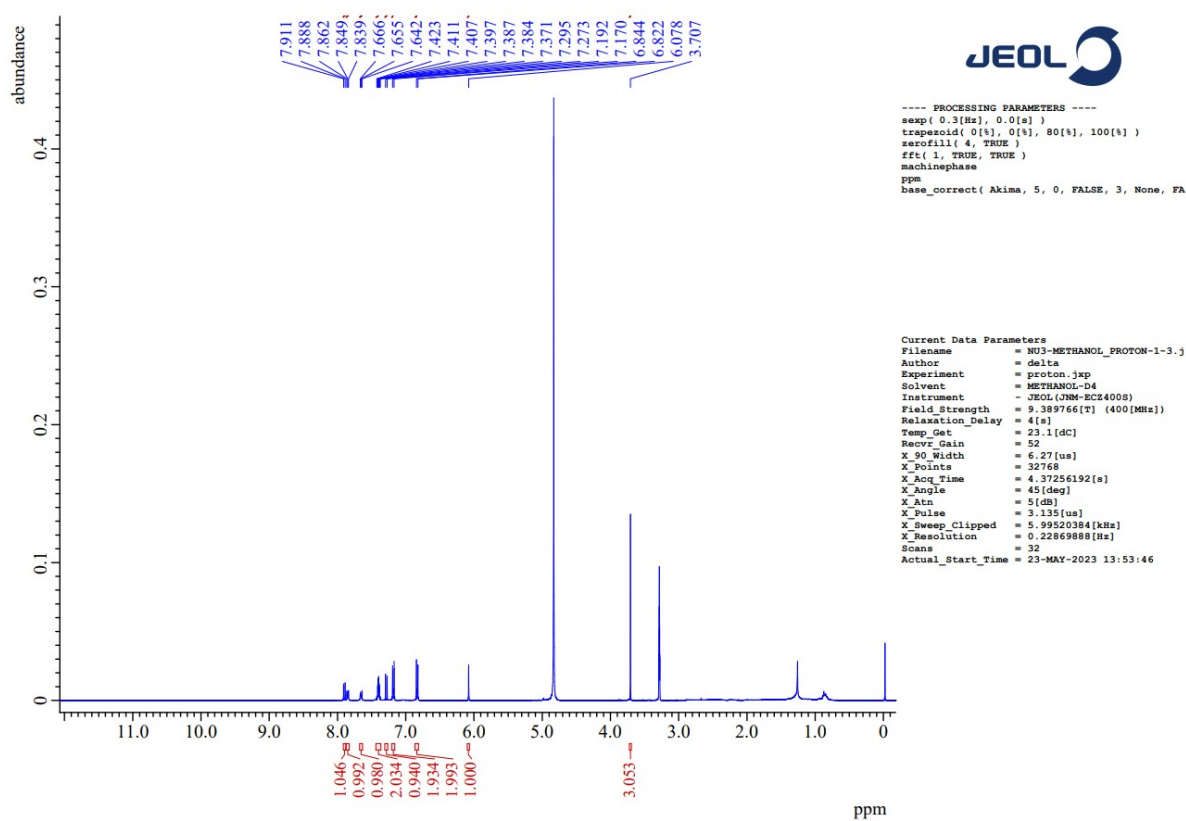

# <sup>1</sup>H-NMR

Reaction No. 4. Product Code: NU4

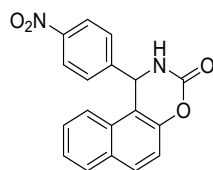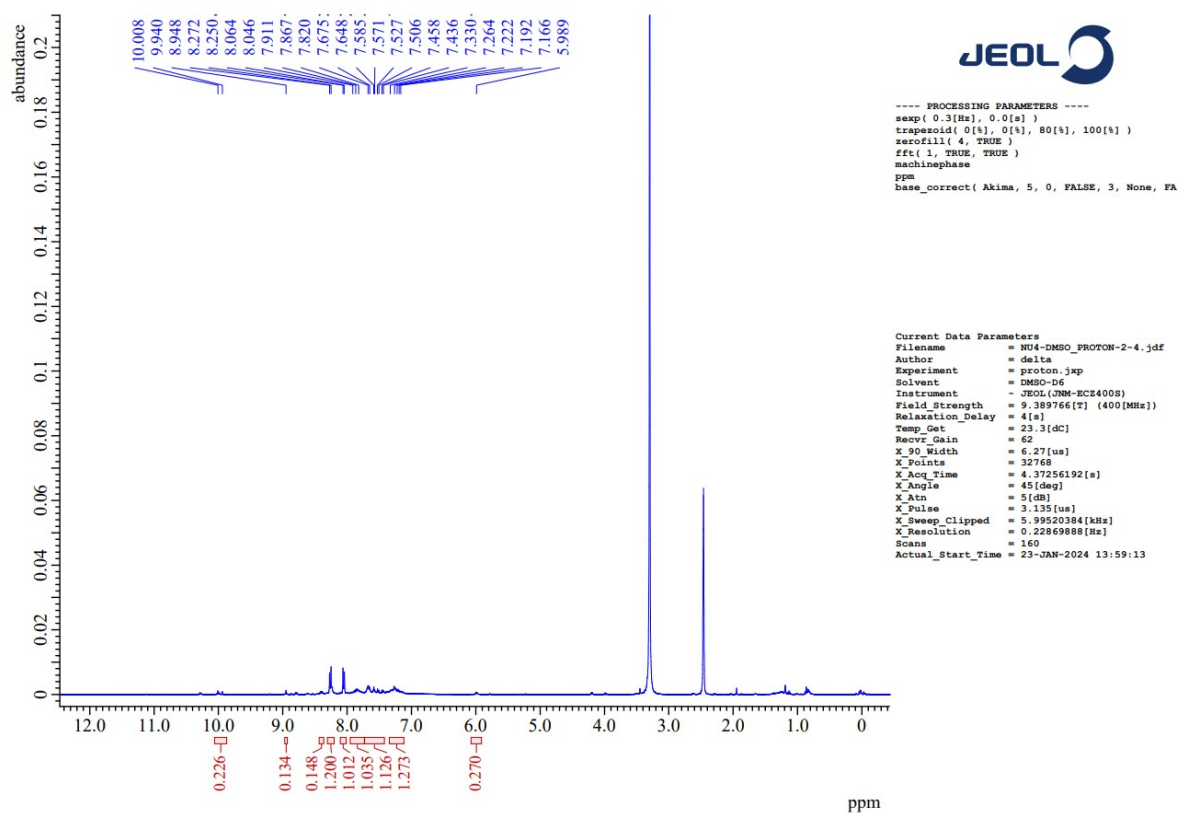

# $C^{13}$ -NMR

Reaction No. 4. Product Code: NU4

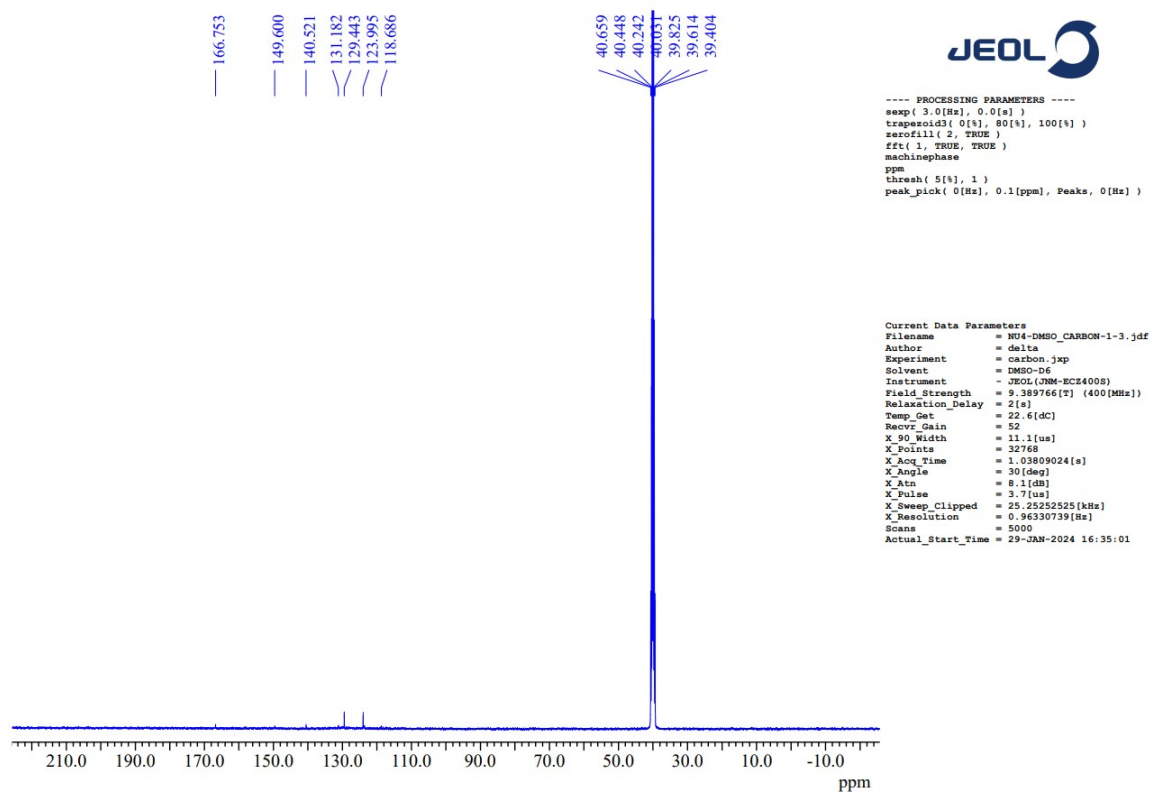

# $^1\text{H}$ -NMR

Reaction No. 5. Product Code: NU5

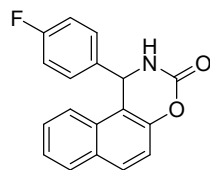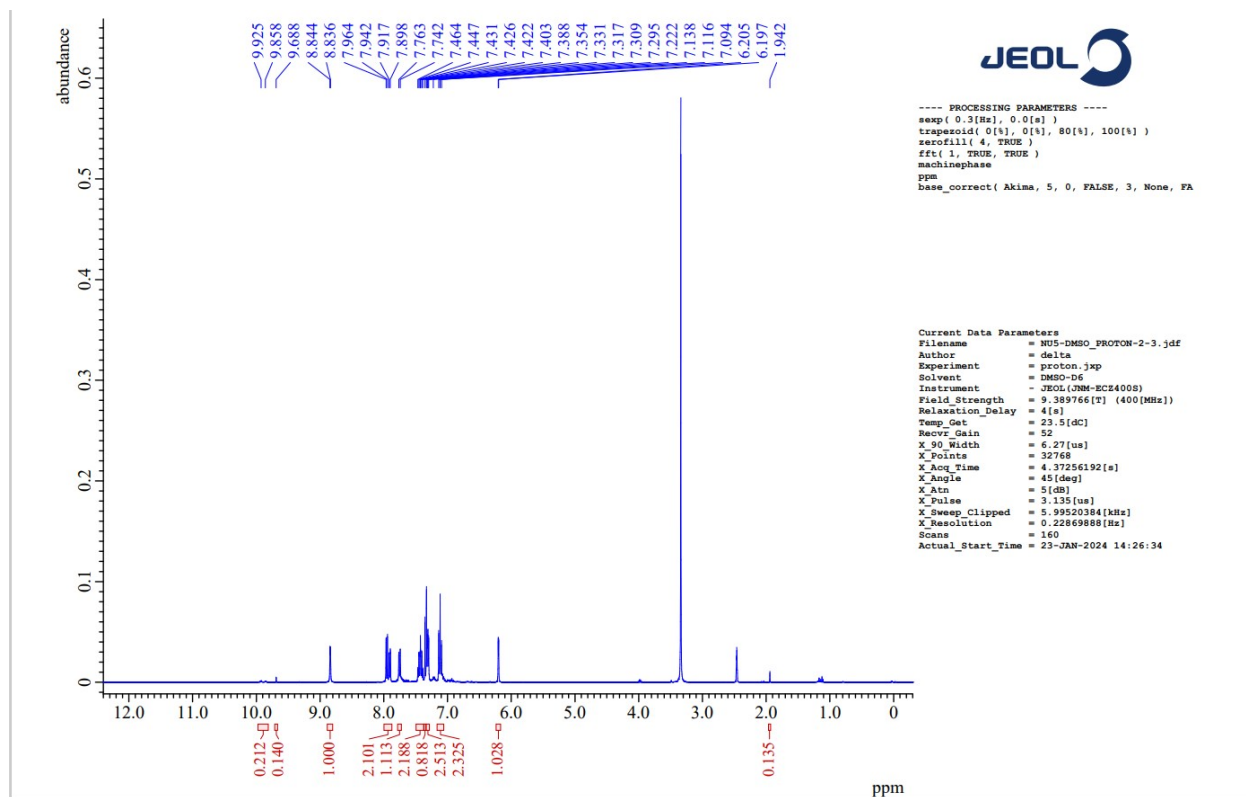



# $C^{13}$ -NMR

Reaction No. 5. Product Code: NU5

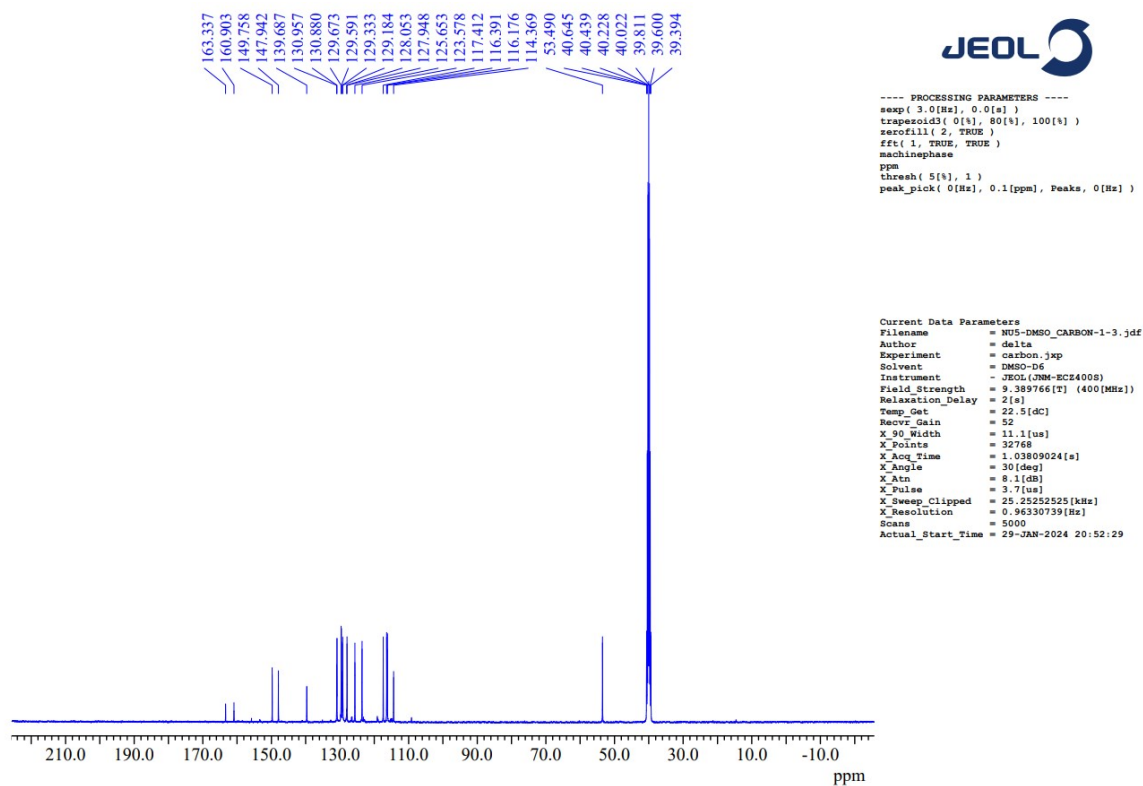

# $^1\text{H}$ -NMR

Reaction No.6 Product Code: NU6

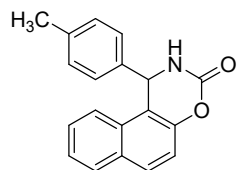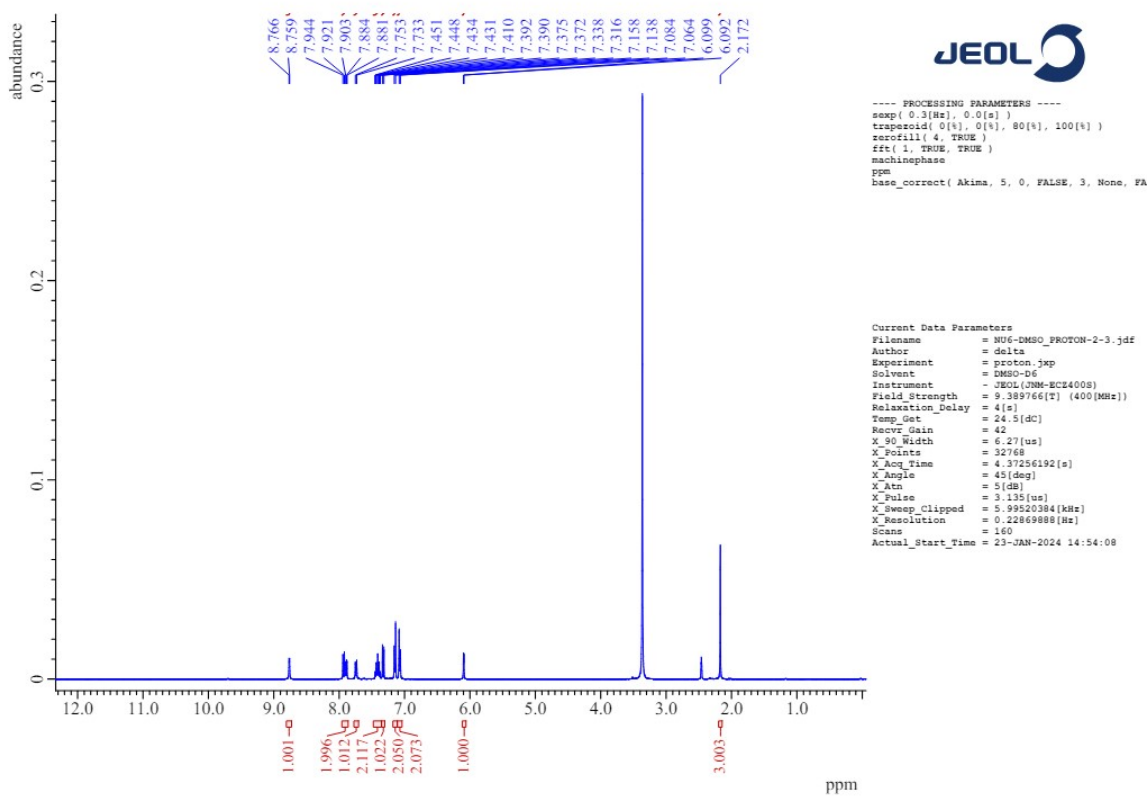

# $C^{13}$ -NMR

Reaction No.6 Product Code: NU6

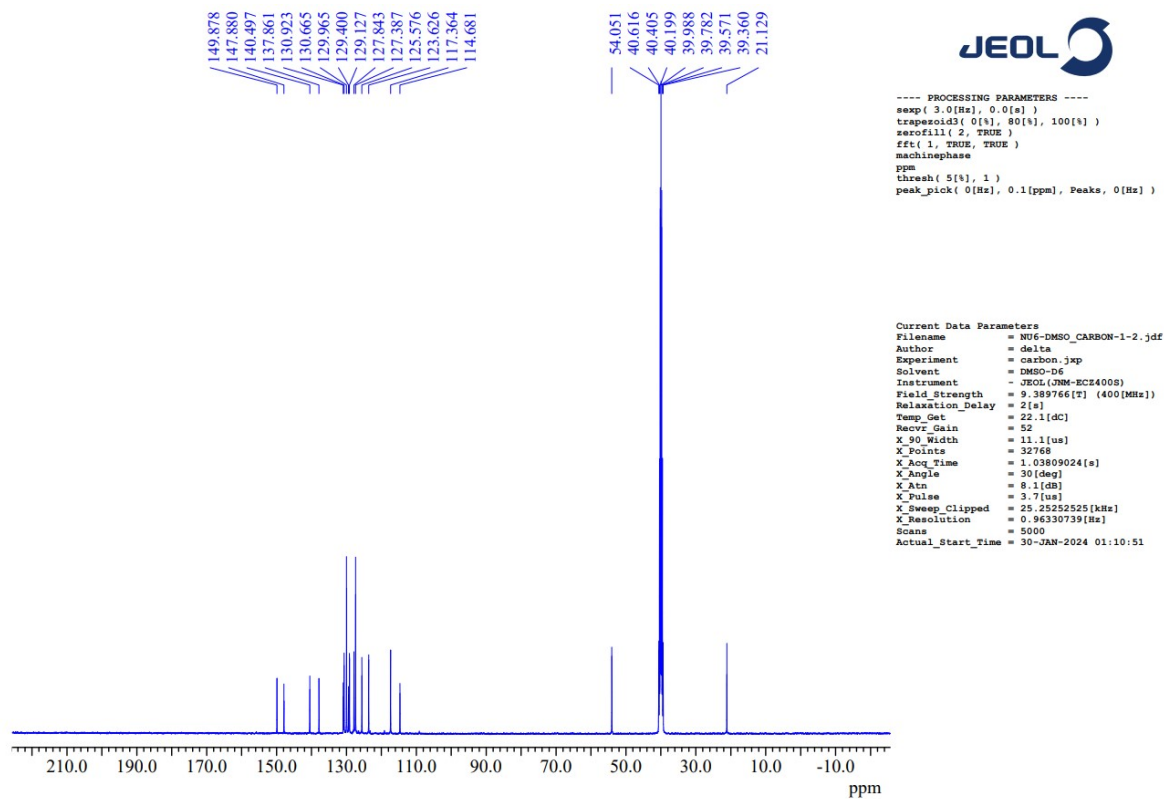

# <sup>1</sup>H-NMR

Reaction No.7 Product Code: NU7

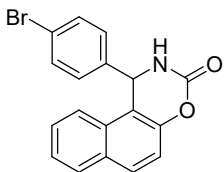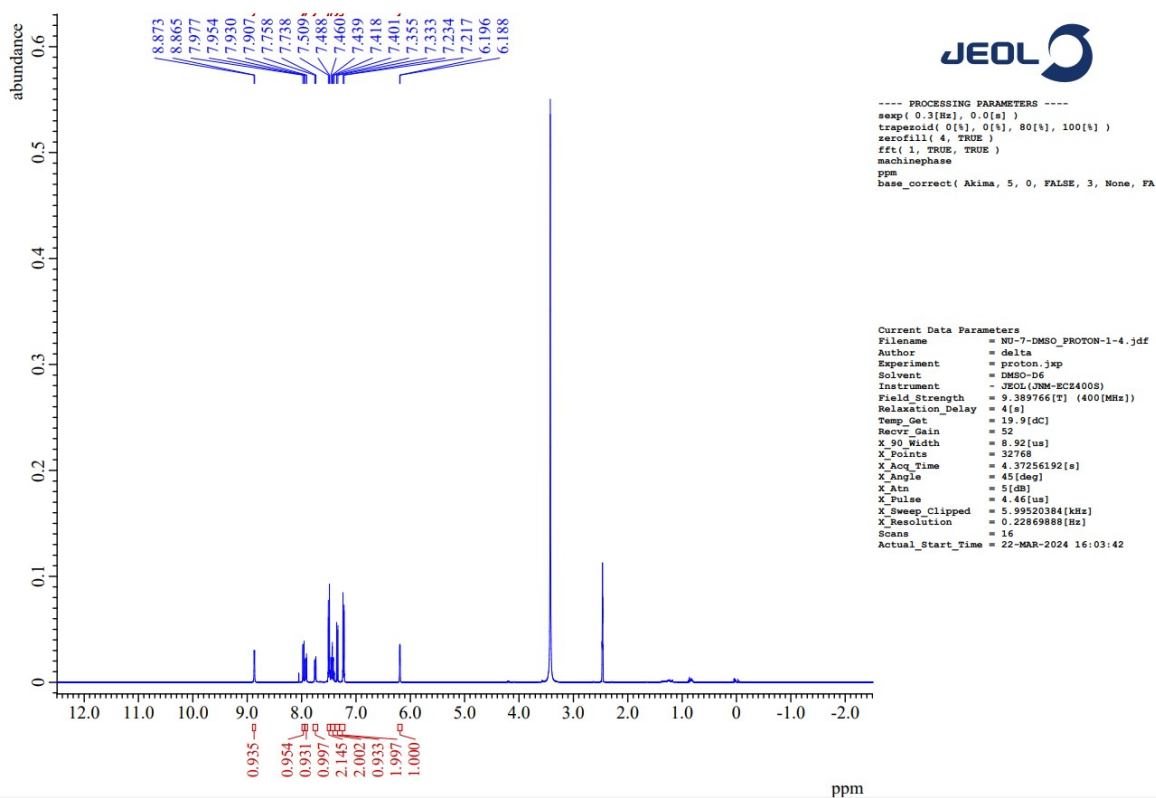

## $C^{13}$ -NMR

Reaction No.7    Product Code: NU7

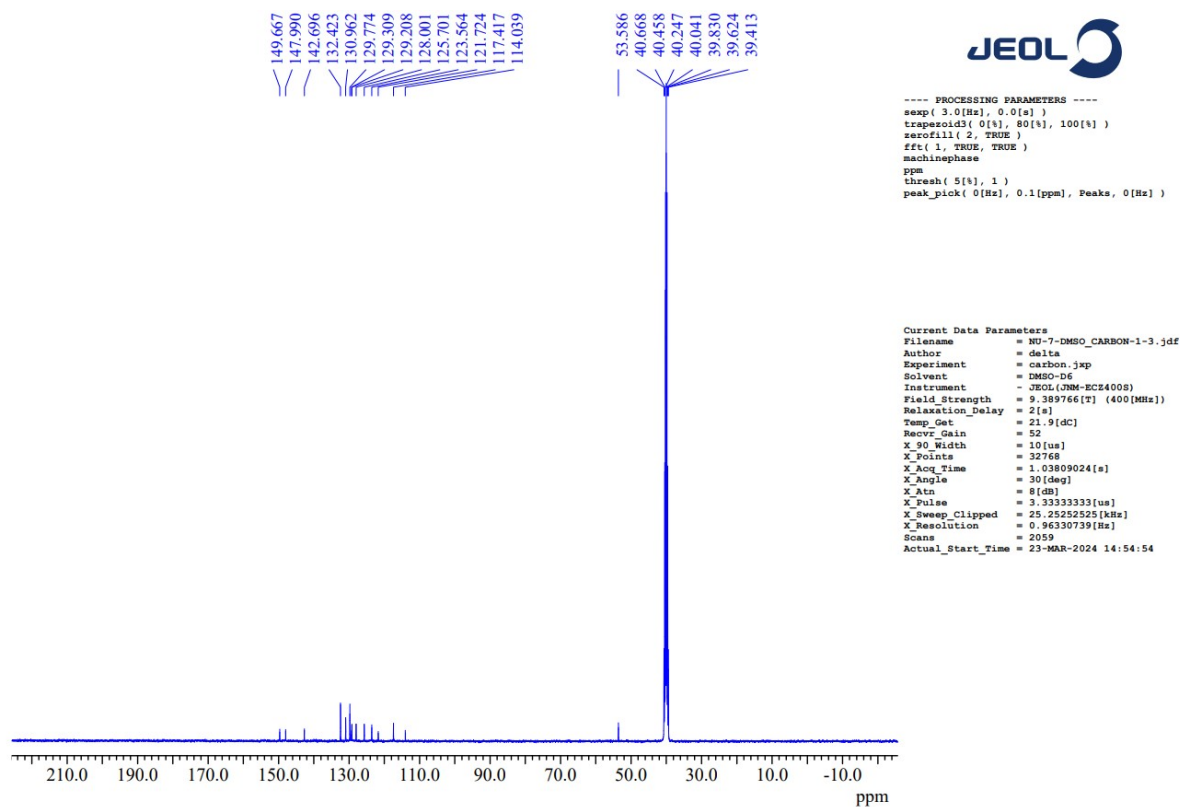

## Reaction Scheme

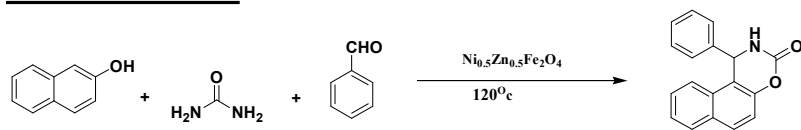

**Figure S1: Optimized transition state 1** **E(RPM6) = -0.04357821 a.u.**

**E(RPM6) = -0.04357821 a.u.**

### Optimized transition state 2

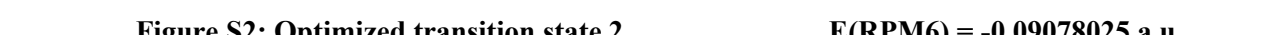

**Figure S2: Optimized transition state 2** **E(RPM6) = -0.09078025 a.u.**

**E(RPM6) = -0.09078025 a.u.**

Predicted transition state structures have been shown as Figure S1 and Figure S2. The proposed mechanism is in agreement with computational studies. The predicted energy of transition state 1 is  $E(\text{RPM6}) = -0.04357821$  a.u., transition state 2 is  $E(\text{RPM6}) = -0.09078025$  a.u. Reaction pathways are supported by a number of energy states. IRC calculations were done and the results are shown in graphs.

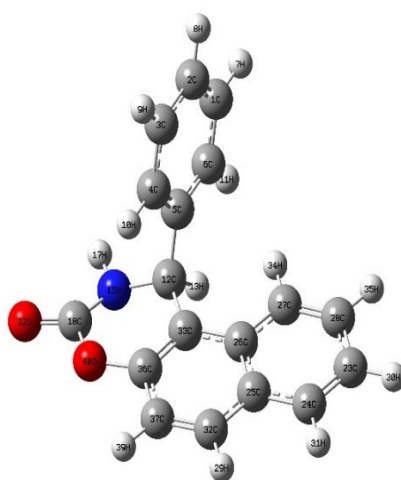

**Figure S3: Optimized Product**

### IRC -TS1

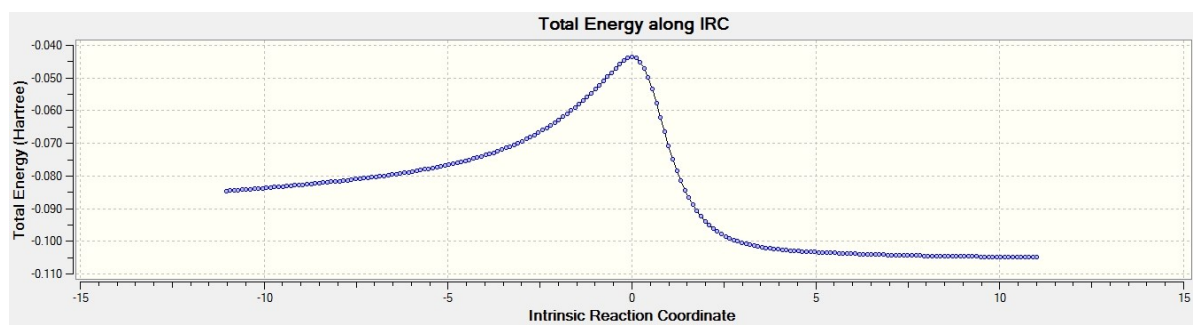

### IRC -TS 2

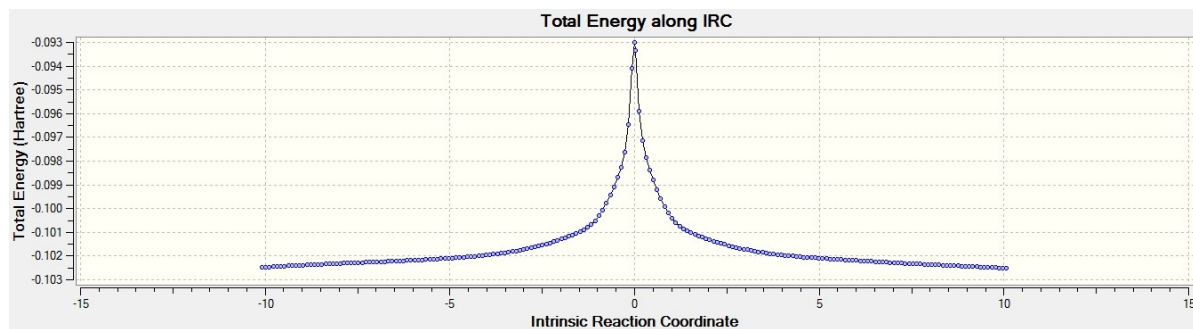

Supplement: d4ra05486e1.pdf [file d4ra05486e1.pdf]
